# Supplementary material for: Ultrasonic Deep Brain Neuromodulation in Acute Disorders of Consciousness: A Proof-of-Concept
Source: MDPI journal article supplement (doi:10.3390/brainsci12040428), 2022-03-23
Supplement: s1 [file s1]

[illegible]

|    |         |   |   |   |   |   |    |
|----|---------|---|---|---|---|---|----|
| 6  | 1       | 1 | 2 | 0 | 0 | 1 | 5  |
|    | 1       | 1 | 2 | 0 | 0 | 1 | 5  |
|    | LIFUP_1 |   |   |   |   |   |    |
|    | 1       | 2 | 2 | 0 | 0 | 1 | 6  |
|    | 4       | 5 | 0 | 0 | 0 | 1 | 10 |
|    | 1       | 1 | 2 | 0 | 0 | 1 | 5  |
|    |         |   |   |   |   |   |    |
| 7  |         |   |   |   |   |   |    |
|    | 0       | 1 | 2 | 0 | 0 | 1 | 4  |
|    | 0       | 1 | 2 | 1 | 0 | 1 | 5  |
|    | LIFUP_1 |   |   |   |   |   |    |
|    | 1       | 1 | 2 | 1 | 0 | 1 | 6  |
|    | 0       | 1 | 2 | 1 | 0 | 1 | 5  |
|    | 0       | 1 | 2 | 1 | 0 | 1 | 5  |
|    | 0       | 1 | 2 | 1 | 0 | 1 | 5  |
|    | LIFUP_2 |   |   |   |   |   |    |
|    | 1       | 1 | 2 | 1 | 0 | 1 | 6  |
|    | 1       | 1 | 2 | 1 | 0 | 1 | 6  |
|    | 1       | 1 | 2 | 1 | 0 | 1 | 6  |
|    |         |   |   |   |   |   |    |
| 8  | 1       | 0 | 2 | 1 | 0 | 0 | 4  |
|    | 1       | 0 | 2 | 1 | 0 | 0 | 4  |
|    | LIFUP_1 |   |   |   |   |   |    |
|    | 0       | 1 | 0 | 1 | 0 | 0 | 2  |
|    | 0       | 1 | 2 | 1 | 0 | 0 | 4  |
|    |         |   |   |   |   |   |    |
| 9  | 1       | 0 | 1 | 1 | 0 | 2 | 5  |
|    | 3       | 1 | 2 | 0 | 0 | 0 | 6  |
|    | LIFUP_1 |   |   |   |   |   |    |
|    | 1       | 2 | 1 | 1 | 0 | 1 | 6  |
|    | 3       | 3 | 2 | 1 | 0 | 1 | 10 |
|    | 3       | 3 | 2 | 1 | 0 | 1 | 10 |
|    |         |   |   |   |   |   |    |
| 10 | 1       | 1 | 2 | 0 | 0 | 1 | 5  |
|    | 3       | 1 | 2 | 1 | 0 | 1 | 8  |
|    | LIFUP_1 |   |   |   |   |   |    |
|    | 0       | 1 | 2 | 1 | 0 | 0 | 4  |
|    | 3       | 2 | 2 | 1 | 0 | 1 | 9  |
|    |         |   |   |   |   |   |    |
| 11 | 1       | 0 | 0 | 0 | 0 | 0 | 1  |
|    | 0       | 0 | 1 | 0 | 0 | 0 | 1  |
|    | 0       | 0 | 1 | 0 | 0 | 0 | 1  |
|    | LIFUP_1 |   |   |   |   |   |    |
|    | 0       | 0 | 1 | 1 | 0 | 0 | 2  |
|    | 0       | 0 | 1 | 1 | 0 | 0 | 2  |

**Supplementary Table S1.** Here, all behavioral data is supplied for each subject. Though the number of assessments varies some between subjects, each subject received at least two CRS-R assessments prior to and following LIFU. These include, necessarily, 1 hour and 1 day prior to and following LIFU. Assessments are supplied chronologically. If additional assessments are present, they represent an assessment taken 1 week prior to and/or following LIFU.
